# Supplementary material for: Metformin decreases miR-122, miR-223 and miR-29a in women with polycystic ovary syndrome
Source: PubMed Central journal article supplement — Endocr Connect. 2020 Oct 1;9(11):1075–84. doi: 10.1530/EC-20-0195 (PMC7774773; doi:10.1530/ec-20-0195), 2020-10-01
Supplement: supplementary_table_2.pdf [file supplementary_table_2.pdf]

**Supplementary Table 2.** Baseline levels of circulating miRNAs

|             | Metformin    | Metformin +OCP | OCP          |         |
|-------------|--------------|----------------|--------------|---------|
|             | Mean (SD)    | Mean (SD)      | Mean (SD)    | p-value |
| miR-122-5p  | -0.16 (0.68) | 0.04 (0.54)    | -0.12 (0.55) | 0.58    |
| miR-1225-3p | 0.01 (0.51)  | -0.06 (0.38)   | 0.07 (0.35)  | 0.62    |
| miR-1267    | 0.06 (0.34)  | 0.18 (0.60)    | -0.03 (0.38) | 0.63    |
| miR-1305    | -0.01 (0.41) | 0.07 (0.31)    | 0.04 (0.27)  | 0.88    |
| miR-145     | 0.09 (0.47)  | 0.20 (0.42)    | -0.04 (0.55) | 0.24    |
| miR-151-3p  | 0.12 (0.36)  | 0.04 (0.49)    | -0.14 (0.57) | 0.26    |
| miR-151-5p  | 0.07 (0.56)  | 0.09 (0.37)    | -0.01 (0.49) | 0.74    |
| miR-223     | 0.08 (0.79)  | 0.15 (0.70)    | -0.19 (0.88) | 0.72    |
| miR-29a     | -0.07 (0.63) | 0.02 (0.53)    | -0.09 (0.45) | 0.70    |
| miR-331     | -0.04 (0.43) | 0.04 (0.43)    | 0.00 (0.56)  | 0.89    |
| miR-342-3p  | -0.06 (0.69) | 0.13 (0.56)    | 0.00 (0.69)  | 0.61    |
| miR-433     | -0.11 (0.41) | 0.18 (0.38)    | -0.04 (0.42) | 0.22    |
| miR-484     | 0.03 (0.53)  | 0.09 (0.53)    | -0.08 (0.69) | 0.64    |
| miR-518b    | 0.10 (0.36)  | -0.12 (0.27)   | -0.17 (0.42) | 0.19    |
| miR-520c-3p | -0.09 (0.26) | 0.01 (0.40)    | 0.06 (0.47)  | 0.54    |
| miR-572     | 0.08 (0.14)  | -0.01 (0.23)   | 0.20 (0.47)  | 0.44    |
| miR-574-3p  | -0.03 (0.64) | 0.18 (0.35)    | -0.03 (0.67) | 0.43    |
| miR-636     | -0.07 (0.29) | -0.03 (0.39)   | 0.08 (0.28)  | 0.30    |
| miR-664     | 0.14 (0.34)  | 0.00 (0.32)    | 0.05 (0.44)  | 0.75    |
| miR-720     | 0.12 (0.50)  | -0.04 (0.54)   | -0.13 (0.71) | 0.61    |
| miR-769-5p  | 0.05 (0.32)  | -0.01 (0.35)   | -0.01 (0.26) | 0.77    |
| U6          | 0.02(0.51)   | -0.10 (0.35)   | -0.01 (0.43) | 0.69    |

**Supplementary Table 2.** Data are presented as mean logarithmically transformed delta Ct-values (Normalized Ct levels) and standard deviation (SD). Differences are tested with one-way ANOVA and Tukey post hoc. OCP: Oral contraceptives
