# Supplementary material for: Metformin decreases miR-122, miR-223 and miR-29a in women with polycystic ovary syndrome
Source: PubMed Central journal article supplement — Endocr Connect. 2020 Oct 1;9(11):1075–84. doi: 10.1530/EC-20-0195 (PMC7774773; doi:10.1530/ec-20-0195), 2020-10-01
Supplement: supplementary_table_3.pdf [file supplementary_table_3.pdf]

**Supplementary table 3A.** Relative changes in miRNA levels between the groups at the end of the trial

| miRNA       | Metformin vs. Metformin+OCP |             |              |                         | Metformin vs. OCP |             |              |                         | Metformin + OCP vs. OCP |      |         |                         |
|-------------|-----------------------------|-------------|--------------|-------------------------|-------------------|-------------|--------------|-------------------------|-------------------------|------|---------|-------------------------|
|             | Mean Difference             | SEM         | p-value      | 95% Confidence Interval | Mean Difference   | SEM         | p-value      | 95% Confidence Interval | Mean Difference         | SEM  | p-value | 95% Confidence Interval |
| miR-122     | <b>-0.71</b>                | <b>0.24</b> | <b>0.01*</b> | -1.27--0.14             | <b>-0.66</b>      | <b>0.24</b> | <b>0.02*</b> | -1.24--0.09             | 0.04                    | 0.22 | 0.98    | -0.49-0.58              |
| miR-1225-3P | 0.06                        | 0.10        | 0.83         | -0.18-0.30              | 0.06              | 0.10        | 0.80         | -0.18-0.31              | 0.01                    | 0.09 | 1.00    | -0.21-0.23              |
| miR-1267    | 0.31                        | 0.18        | 0.25         | -0.17-0.78              | 0.14              | 0.21        | 0.78         | -0.39-0.67              | -0.17                   | 0.19 | 0.67    | -0.67-0.33              |
| miR-1305    | 0.17                        | 0.19        | 0.65         | -0.32-0.66              | 0.11              | 0.19        | 0.84         | -0.37-0.58              | -0.07                   | 0.17 | 0.92    | -0.51-0.37              |
| miR-145     | -0.35                       | 0.15        | 0.07         | -0.72-0.02              | -0.25             | 0.15        | 0.26         | -0.62-0.13              | 0.10                    | 0.14 | 0.75    | -0.24-0.45              |
| miR-151-3p  | -0.27                       | 0.18        | 0.31         | -0.70-0.17              | -0.17             | 0.18        | 0.61         | -0.62-0.27              | 0.09                    | 0.17 | 0.85    | -0.32-0.50              |
| miR-151-5p  | -0.23                       | 0.18        | 0.39         | -0.66-0.19              | -0.21             | 0.18        | 0.48         | -0.64-0.22              | 0.03                    | 0.17 | 0.99    | -0.38-0.43              |
| miR-223     | <b>-0.49</b>                | <b>0.18</b> | <b>0.02*</b> | -0.93--0.06             | -0.30             | 0.18        | 0.24         | -0.73-0.14              | 0.20                    | 0.17 | 0.48    | -0.21-0.60              |
| miR-29a     | <b>-0.51</b>                | <b>0.17</b> | <b>0.01*</b> | -0.93--0.09             | <b>-0.43</b>      | <b>0.17</b> | <b>0.05*</b> | -0.85--0.01             | 0.09                    | 0.17 | 0.86    | -0.31-0.48              |
| miR-331     | -0.09                       | 0.13        | 0.77         | -0.41-0.23              | -0.11             | 0.13        | 0.70         | -0.43-0.21              | -0.02                   | 0.12 | 0.99    | -0.30-0.27              |
| miR-342-3p  | -0.35                       | 0.15        | 0.07         | -0.72-0.02              | -0.31             | 0.16        | 0.12         | -0.69-0.06              | 0.04                    | 0.15 | 0.96    | -0.31-0.39              |
| miR-433     | -0.15                       | 0.13        | 0.51         | -0.47-0.17              | 0.07              | 0.14        | 0.85         | -0.26-0.41              | 0.22                    | 0.12 | 0.16    | -0.07-0.51              |
| miR-484     | -0.27                       | 0.13        | 0.09         | -0.58-0.03              | -0.15             | 0.13        | 0.48         | -0.46-0.16              | 0.13                    | 0.12 | 0.55    | -0.16-0.41              |
| miR-518b    | 0.37                        | 0.26        | 0.36         | -0.29-1.03              | 0.17              | 0.28        | 0.82         | -0.53-0.86              | -0.20                   | 0.18 | 0.53    | -0.66-0.26              |
| miR-520c    | 0.09                        | 0.11        | 0.74         | -0.19-0.36              | -0.03             | 0.11        | 0.97         | -0.30-0.25              | -0.11                   | 0.11 | 0.55    | -0.37-0.15              |
| miR-572     | 0.17                        | 0.13        | 0.43         | -0.17-0.51              | 0.11              | 0.15        | 0.75         | -0.27-0.49              | -0.06                   | 0.13 | 0.89    | -0.40-0.28              |
| miR-574-3p  | -0.30                       | 0.13        | 0.06         | -0.61-0.01              | -0.22             | 0.13        | 0.21         | -0.53-0.09              | 0.08                    | 0.12 | 0.80    | -0.21-0.37              |
| miR-636     | 0.15                        | 0.11        | 0.36         | -0.11-0.42              | 0.10              | 0.11        | 0.66         | -0.17-0.37              | -0.05                   | 0.11 | 0.87    | -0.31-0.20              |
| miR-664     | -0.02                       | 0.19        | 1.00         | -0.49-0.45              | -0.16             | 0.19        | 0.70         | -0.63-0.32              | -0.14                   | 0.15 | 0.64    | -0.51-0.23              |
| miR-720     | -0.03                       | 0.17        | 0.98         | -0.43-0.36              | 0.09              | 0.17        | 0.87         | -0.32-0.49              | 0.12                    | 0.16 | 0.73    | -0.26-0.50              |
| miR-769-5p  | -0.07                       | 0.14        | 0.88         | -0.41-0.27              | -0.06             | 0.15        | 0.91         | -0.42-0.29              | 0.00                    | 0.13 | 1.00    | -0.31-0.32              |

SEM: Standard error of the mean, \*, p<0.05

**Supplementary table 3B.** Paired sample t-test within each treatment group

|             | Metformin                |             |              | Metformin + OCP          |      |      | OCP                      |             |              |
|-------------|--------------------------|-------------|--------------|--------------------------|------|------|--------------------------|-------------|--------------|
|             | Mean log difference (CI) | SEM         | p            | Mean log difference (CI) | SEM  | p    | Mean log Difference (CI) | SEM         | p            |
| miR-122-5p  | <b>0.47 (-0.04-0.97)</b> | <b>0.24</b> | <b>0.06</b>  | 0.00 (-0.40-0.40)        | 0.19 | 0.99 | -0.16 (-0.48-0.16)       | 0.15        | 0.30         |
| miR-1225-3P | 0.07 (-0.22-0.35)        | 0.13        | 0.62         | 0.01 (-0.20-0.23)        | 0.10 | 0.91 | 0.25 (-0.01-0.51)        | 0.12        | 0.06         |
| miR-1267    | 0.23 (-0.23-0.68)        | 0.11        | 0.17         | 0.80 (-0.57-2.17)        | 0.32 | 0.13 | 0.58 (-0.19-1.35)        | 0.18        | 0.08         |
| miR-1305    | -0.07 (-1.16-1.03)       | 0.25        | 0.82         | 0.28 (-0.47-1.00)        | 0.27 | 0.35 | 0.00 (-0.32-0.32)        | 0.12        | 0.99         |
| miR-145     | 0.34 (-0.10-0.78)        | 0.20        | 0.12         | 0.06 (-0.16-0.29)        | 0.11 | 0.55 | -0.05 (-0.39-0.29)       | 0.16        | 0.77         |
| miR-151-3p  | <b>0.47 (0.07-0.88)</b>  | <b>0.19</b> | <b>0.03*</b> | 0.07 (-0.27-0.40)        | 0.16 | 0.68 | -0.09 (-0.47-0.29)       | 0.18        | 0.64         |
| miR-151-5p  | 0.23 (-0.21-0.68)        | 0.21        | 0.28         | -0.04 (-0.38-0.29)       | 0.16 | 0.79 | -0.12 (-0.49-0.24)       | 0.17        | 0.49         |
| miR-223     | 0.20 (-0.17-0.58)        | 0.18        | 0.27         | -0.26 (-0.64-0.11)       | 0.18 | 0.16 | -0.39 (-0.90-0.11)       | 0.24        | 0.12         |
| miR-29a     | <b>0.50 (0.05-0.95)</b>  | <b>0.21</b> | <b>0.03*</b> | 0.09 (-0.28-0.45)        | 0.17 | 0.63 | 0.06 (-0.27-0.39)        | 0.16        | 0.71         |
| miR-331     | -0.02 (-0.54-0.49)       | 0.22        | 0.92         | -0.09 (-0.38-0.20)       | 0.13 | 0.51 | -0.20 (-0.57-0.18)       | 0.17        | 0.28         |
| miR-342-3p  | 0.08 (-0.34-0.51)        | 0.20        | 0.68         | -0.11 (-0.43-0.20)       | 0.15 | 0.47 | -0.26 (-0.58-0.06)       | 0.15        | 0.11         |
| miR-433     | -0.13 (-0.33-0.08)       | 0.09        | 0.19         | -0.13 (-0.31-0.06)       | 0.09 | 0.17 | 0.07 (-0.23-0.38)        | 0.14        | 0.60         |
| miR-518b    | 0.22 (-0.11-0.55)        | 0.58        | 0.77         | -0.13 (-0.55-0.29)       | 0.18 | 0.49 | <sup>a</sup>             |             |              |
| miR-520c-3p | -0.09 (-0.30-0.12)       | 0.10        | 0.38         | 0.12 (-0.05-0.30)        | 0.08 | 0.15 | 0.04 (-0.25-0.33)        | 0.14        | 0.78         |
| miR-572     | -0.21 (-0.78-0.35)       | 0.04        | 0.13         | -0.15 (-0.74-0.43)       | 0.18 | 0.47 | <sup>a</sup>             |             |              |
| miR-574-3p  | 0.06 (-0.23-0.35)        | 0.13        | 0.66         | -0.15 (-0.34-0.05)       | 0.09 | 0.13 | -0.26 (-0.65-0.12)       | 0.18        | 0.17         |
| miR-636     | -0.05 (-0.31-0.21)       | 0.12        | 0.70         | 0.14 (-0.08-0.35)        | 0.10 | 0.19 | <b>0.23 (0.06-0.39)</b>  | <b>0.08</b> | <b>0.01*</b> |
| miR-664     | 0.11 (-0.48-0.70)        | 0.19        | 0.61         | 0.05 (-0.43-0.53)        | 0.20 | 0.82 | -0.07 (-0.43-0.29)       | 0.16        | 0.67         |
| miR-720     | 0.33 (-0.05-0.72)        | 0.18        | 0.09         | 0.17 (-0.13-0.47)        | 0.14 | 0.24 | 0.11 (-0.28-0.50)        | 0.19        | 0.56         |
| miR-769-5p  | 0.23 (-0.18-0.64)        | 0.18        | 0.23         | 0.10 (-0.15-0.34)        | 0.11 | 0.41 | 0.08 (-0.19-0.36)        | 0.12        | 0.51         |

CI: Confidence Interval, SEM: Standard Error of the mean, \*p<0,05, <sup>a</sup>: Too few valid pairs
