# Supplementary material for: Metformin decreases miR-122, miR-223 and miR-29a in women with polycystic ovary syndrome
Source: PubMed Central journal article supplement — Endocr Connect. 2020 Oct 1;9(11):1075–84. doi: 10.1530/EC-20-0195 (PMC7774773; doi:10.1530/ec-20-0195), 2020-10-01
Supplement: supplementary_table_4.pdf [file supplementary_table_4.pdf]

**Supplementary Table 4.** Correlations at baseline between significantly altered miRNA and clinical values

|                   | miR-122-5p |      | miR-151-3p |      | miR-223 |      | miR-29a |      | miR-636 |      |
|-------------------|------------|------|------------|------|---------|------|---------|------|---------|------|
|                   | rho        | p    | rho        | p    | Rho     | p    | rho     | p    | rho     | p    |
| Weight            | 0.19       | 0.16 | -0.06      | 0.66 | 0.02    | 0.86 | -0.14   | 0.33 | -0.03   | 0.81 |
| BMI               | 0.36**     | 0.01 | 0.01       | 0.99 | 0.13    | 0.31 | -0.04   | 0.80 | 0.02    | 0.99 |
| WHR               | 0.28*      | 0.04 | 0.19       | 0.15 | 0.27*   | 0.04 | 0.18    | 0.18 | -0.06   | 0.64 |
| Total T           | 0.16       | 0.23 | 0.03       | 0.80 | -0.07   | 0.60 | 0.01    | 0.95 | 0.01    | 0.98 |
| Free T            | 0.19       | 0.17 | 0.13       | 0.33 | 0.04    | 0.77 | -0.03   | 0.81 | -0.05   | 0.73 |
| FG-score          | 0.05       | 0.70 | -0.01      | 0.97 | 0.02    | 0.86 | -0.06   | 0.07 | 0.11    | 0.41 |
| SHBG              | 0.03       | 0.84 | -0.06      | 0.64 | -0.11   | 0.42 | 0.07    | 0.60 | 0.02    | 0.91 |
| Total cholesterol | -0.03      | 0.86 | -0.07      | 0.63 | -0.09   | 0.50 | -0.06   | 0.69 | 0.15    | 0.29 |
| HDL-cholesterol   | -0.27*     | 0.05 | -0.22      | 0.11 | -0.21   | 0.11 | -0.19   | 0.17 | -0.10   | 0.48 |
| LDL-cholesterol   | 0.09       | 0.53 | 0.06       | 0.64 | 0.03    | 0.85 | 0.01    | 0.93 | 0.13    | 0.36 |
| Triglycerides     | 0.13       | 0.34 | 0.07       | 0.63 | 0.01    | 0.99 | 0.09    | 0.52 | -0.10   | 0.47 |
| Fasting glucose   | 0.15       | 0.27 | 0.04       | 0.77 | 0.12    | 0.38 | 0.17    | 0.22 | 0.07    | 0.60 |
| Insulin           | 0.11       | 0.41 | -0.19      | 0.16 | -0.07   | 0.62 | -0.20   | 0.15 | 0.12    | 0.40 |
| C-peptide         | 0.03       | 0.82 | -0.16      | 0.22 | -0.08   | 0.57 | -0.16   | 0.25 | 0.01    | 0.99 |
| HOMA-IR           | 0.13       | 0.36 | -0.20      | 0.15 | -0.04   | 0.76 | -0.18   | 0.19 | 0.12    | 0.40 |
| Fat, arms         | 0.27*      | 0.04 | -0.05      | 0.99 | 0.13    | 0.32 | 0.11    | 0.45 | -0.17   | 0.23 |
| Fat, legs         | 0.04       | 0.75 | -0.15      | 0.28 | -0.02   | 0.99 | -0.07   | 0.60 | -0.05   | 0.75 |
| Fat, upper        | 0.28*      | 0.04 | -0.10      | 0.47 | 0.04    | 0.75 | -0.03   | 0.81 | -0.03   | 0.82 |

Spearman's Rho. Unadjusted. All significant rho-values (\*) were insignificant after adjustment for BMI and age. The correlation between miR-122-5p and BMI (\*\*), remained significant after adjustment for age (Rho =0.37, p=0.006), WHR: Waist-hip ratio, T: Testosterone. \*p<0.05
